# Supplementary material for: Vitamin D binding protein induces skeletal muscle atrophy and contributes to cancer-associated muscle wasting
Source: Research Square preprint supplement (doi:10.21203/rs.3.rs-4289125/v1), 2024-05-07
Supplement: Supplementary file 1 [file 3e8ec58f3eea51893a388067.xlsx]

## Sheet: Foglio1
Supplemental Table 1
		Group	p-value	Fold Change
Q8VDM4	PSMD2_MOUSE	26S proteasome non-ATPase regulatory subunit 2 OS=Mus musculus GN=Psmd2 PE=1 SV=1	0.02146	1.7571
P13541	MYH3_MOUSE	sp|P13541|MYH3_MOUSE Myosin-3 OS=Mus musculus GN=Myh3 PE=2 SV=2	0.00563	1.44594
P09103	PDIA1_MOUSE	sp|P09103|PDIA1_MOUSE Protein disulfide-isomerase OS=Mus musculus GN=P4hb PE=1 SV=2	0.03858	1.43229
Q9QXS1-8	PLEC_MOUSE	sp|Q9QXS1-14|PLEC_MOUSE Isoform PLEC-1G of Plectin OS=Mus musculus GN=Plec	0.02937	0.755717
P08249	MDHM_MOUSE	Malate dehydrogenase, mitochondrial OS=Mus musculus GN=Mdh2 PE=1 SV=3	0.0187	0.752713
P52480	KPYM_MOUSE	sp|P52480-2|KPYM_MOUSE Isoform M1 of Pyruvate kinase PKM OS=Mus musculus GN=Pkm	0.00928	0.731303
P13020	GELS_MOUSE	sp|P13020-2|GELS_MOUSE Isoform 2 of Gelsolin OS=Mus musculus GN=Gsn	0.03774	0.721851
P14131	RS16_MOUSE	sp|P14131|RS16_MOUSE 40S ribosomal protein S16 OS=Mus musculus GN=Rps16 PE=1 SV=4	0.00874	0.719853
Q8CAQ8-5	MIC60_MOUSE	Isoform 5 of MICOS complex subunit Mic60 OS=Mus musculus GN=Immt	0.03519	0.711121
P06745	G6PI_MOUSE	sp|P06745|G6PI_MOUSE Glucose-6-phosphate isomerase OS=Mus musculus GN=Gpi PE=1 SV=4	0.01334	0.710024
P50446	K2C6A_MOUSE	sp|P50446|K2C6A_MOUSE Keratin, type II cytoskeletal 6A OS=Mus musculus GN=Krt6a PE=1 SV=3	0.01486	0.708589
Q9CPQ1	COX6C_MOUSE	sp|Q9CPQ1|COX6C_MOUSE Cytochrome c oxidase subunit 6C OS=Mus musculus GN=Cox6c PE=1 SV=3	0.0481	0.699218
P80314	TCPB_MOUSE	sp|P80314|TCPB_MOUSE T-complex protein 1 subunit beta OS=Mus musculus GN=Cct2 PE=1 SV=4	0.02488	0.698117
P09405	NUCL_MOUSE	sp|P09405|NUCL_MOUSE Nucleolin OS=Mus musculus GN=Ncl PE=1 SV=2	0.0158	0.686849
Q99MN1	SYK_MOUSE	Lysine--tRNA ligase OS=Mus musculus GN=Kars PE=1 SV=1	0.04405	0.684395
P63276	RS17_MOUSE	40S ribosomal protein S17 OS=Mus musculus GN=Rps17 PE=1 SV=2	0.03207	0.681325
Q6R0H7-4	GNAS1_MOUSE	sp|Q6R0H7-4|GNAS1_MOUSE Isoform XLas-4 of Guanine nucleotide-binding protein G(s) subunit alpha isoforms XLas OS=Mus musculus GN=Gnas	0.0379	0.673816
Q8BWB1	SYP2L_MOUSE	sp|Q8BWB1|SYP2L_MOUSE Synaptopodin 2-like protein OS=Mus musculus GN=Synpo2l PE=1 SV=1	0.00499	0.672176
Q8BWT1	THIM_MOUSE	sp|Q8BWT1|THIM_MOUSE 3-ketoacyl-CoA thiolase, mitochondrial OS=Mus musculus GN=Acaa2 PE=1 SV=3	0.04549	0.667354
Q9DCN2	NB5R3_MOUSE	sp|Q9DCN2-2|NB5R3_MOUSE Isoform 2 of NADH-cytochrome b5 reductase 3 OS=Mus musculus GN=Cyb5r3	0.00061	0.66033
Q61598	GDIB_MOUSE	Rab GDP dissociation inhibitor beta OS=Mus musculus GN=Gdi2 PE=1 SV=1	0.0289	0.638649
P62301	RS13_MOUSE	40S ribosomal protein S13 OS=Mus musculus GN=Rps13 PE=1 SV=2	0.00078	0.627313
P62320	SMD3_MOUSE	sp|P62320|SMD3_MOUSE Small nuclear ribonucleoprotein Sm D3 OS=Mus musculus GN=Snrpd3 PE=1 SV=1	0.02063	0.616201
Q922R8	PDIA6_MOUSE	Protein disulfide-isomerase A6 OS=Mus musculus GN=Pdia6 PE=1 SV=3	0.01195	0.593661
P62806	H4_MOUSE	Histone H4 OS=Mus musculus GN=Hist1h4a PE=1 SV=2	0.01529	0.562536
Q78PY7	SND1_MOUSE	sp|Q78PY7|SND1_MOUSE Staphylococcal nuclease domain-containing protein 1 OS=Mus musculus GN=Snd1 PE=1 SV=1	0.02808	0.514309
P61089	UBE2N_MOUSE	sp|P61089|UBE2N_MOUSE Ubiquitin-conjugating enzyme E2 N OS=Mus musculus GN=Ube2n PE=1 SV=1	0.03978	0.470669
Q8VED5	K2C79_MOUSE	Keratin, type II cytoskeletal 79 OS=Mus musculus GN=Krt79 PE=1 SV=2	0.00856	0.41493
O88990	ACTN3_MOUSE	sp|O88990|ACTN3_MOUSE Alpha-actinin-3 OS=Mus musculus GN=Actn3 PE=2 SV=1	0.01415	0.408935
Q8BGZ7	K2C75_MOUSE	sp|Q8BGZ7|K2C75_MOUSE Keratin, type II cytoskeletal 75 OS=Mus musculus GN=Krt75 PE=1 SV=1	0.01145	0.386623
P62305	RUXE_MOUSE	Small nuclear ribonucleoprotein E OS=Mus musculus GN=Snrpe PE=1 SV=1	0.03341	0.329193
Q8BMK4	CKAP4_MOUSE	sp|Q8BMK4|CKAP4_MOUSE Cytoskeleton-associated protein 4 OS=Mus musculus GN=Ckap4 PE=1 SV=2	0.01993	0.312013
P42932	TCPQ_MOUSE	sp|P42932|TCPQ_MOUSE T-complex protein 1 subunit theta OS=Mus musculus GN=Cct8 PE=1 SV=3	0.00975	0.290456
O70503	DHB12_MOUSE	sp|O70503|DHB12_MOUSE Very-long-chain 3-oxoacyl-CoA reductase OS=Mus musculus GN=Hsd17b12 PE=1 SV=1	0.0335	0.246388
Q9R0P5	DEST_MOUSE	Destrin OS=Mus musculus GN=Dstn PE=1 SV=3	0.00092	0.149028
