# Supplementary material for: Vitamin D binding protein induces skeletal muscle atrophy and contributes to cancer-associated muscle wasting
Source: Research Square preprint supplement (doi:10.21203/rs.3.rs-4289125/v1), 2024-05-07
Supplement: Supplementary file 2 [file 68858a1f6f11121e34998d53.xlsx]

## Sheet: Foglio1
Supplemental Table 2
		Group	p-value	Fold Change
Q3UTJ2	SRBS2_MOUSE	Sorbin and SH3 domain-containing protein 2 OS=Mus musculus GN=Sorbs2 PE=1 SV=2	1.1745e-07	20
P42669	PURA_MOUSE	Transcriptional activator protein Pur-alpha OS=Mus musculus GN=Pura PE=1 SV=1	5.9286e-06	20
O55013	TPPC3_MOUSE	Trafficking protein particle complex subunit 3 OS=Mus musculus GN=Trappc3 PE=1 SV=1	1.7523e-05	0.0174911
Q9D892	ITPA_MOUSE	Inosine triphosphate pyrophosphatase OS=Mus musculus GN=Itpa PE=1 SV=2	0.00033	0.05
Q8BJU0	SGTA_MOUSE	Small glutamine-rich tetratricopeptide repeat-containing protein alpha OS=Mus musculus GN=Sgta PE=1 SV=2	0.00115	0.199111
P61027	RAB10_MOUSE	Ras-related protein Rab-10 OS=Mus musculus GN=Rab10 PE=1 SV=1	0.00324	0.700189
Q4VAA2	CDV3_MOUSE	Protein CDV3 OS=Mus musculus GN=Cdv3 PE=1 SV=2	0.00351	0.430796
O88543	CSN3_MOUSE	COP9 signalosome complex subunit 3 OS=Mus musculus GN=Cops3 PE=1 SV=3	0.00415	0.273709
Q5SX39	MYH4_MOUSE	Myosin-4 OS=Mus musculus GN=Myh4 PE=2 SV=1	0.00424	0.625591
E9PZQ0	RYR1_MOUSE	Ryanodine receptor 1 OS=Mus musculus GN=Ryr1 PE=1 SV=1	0.00453	0.738354
P97372	PSME2_MOUSE	Proteasome activator complex subunit 2 OS=Mus musculus GN=Psme2 PE=1 SV=4	0.00498	1.72002
Q9ET78	JPH2_MOUSE	Junctophilin-2 OS=Mus musculus GN=Jph2 PE=1 SV=2	0.00527	0.441038
Q9QXZ0	MACF1_MOUSE	Microtubule-actin cross-linking factor 1 OS=Mus musculus GN=Macf1 PE=1 SV=2	0.00738	0.704622
Q6NZJ6	IF4G1_MOUSE	Eukaryotic translation initiation factor 4 gamma 1 OS=Mus musculus GN=Eif4g1 PE=1 SV=1	0.00775	0.671943
Q5SX40	MYH1_MOUSE	Myosin-1 OS=Mus musculus GN=Myh1 PE=1 SV=1	0.00884	0.710556
Q99JB8	PACN3_MOUSE	Protein kinase C and casein kinase II substrate protein 3 OS=Mus musculus GN=Pacsin3 PE=1 SV=1	0.00893	0.62326
Q99L13	3HIDH_MOUSE	3-hydroxyisobutyrate dehydrogenase, mitochondrial OS=Mus musculus GN=Hibadh PE=1 SV=1	0.01014	0.741616
Q9JIY5	HTRA2_MOUSE	Serine protease HTRA2, mitochondrial OS=Mus musculus GN=Htra2 PE=1 SV=2	0.01149	4.93428
Q8CGY6	UN45B_MOUSE	Protein unc-45 homolog B OS=Mus musculus GN=Unc45b PE=1 SV=1	0.01259	0.670871
Q8K3J1	NDUS8_MOUSE	NADH dehydrogenase [ubiquinone] iron-sulfur protein 8, mitochondrial OS=Mus musculus GN=Ndufs8 PE=1 SV=1	0.01313	0.722044
Q9WUM4	COR1C_MOUSE	Coronin-1C OS=Mus musculus GN=Coro1c PE=1 SV=2	0.01546	1.44545
Q3THS6	METK2_MOUSE	S-adenosylmethionine synthase isoform type-2 OS=Mus musculus GN=Mat2a PE=1 SV=2	0.01719	0.431185
Q62433	NDRG1_MOUSE	Protein NDRG1 OS=Mus musculus GN=Ndrg1 PE=1 SV=1	0.01772	0.25376
Q791T5	MTCH1_MOUSE	Mitochondrial carrier homolog 1 OS=Mus musculus GN=Mtch1 PE=1 SV=1	0.0244	0.05
Q9Z1D1	EIF3G_MOUSE	Eukaryotic translation initiation factor 3 subunit G OS=Mus musculus GN=Eif3g PE=1 SV=2	0.02486	0.702821
Q60598	SRC8_MOUSE	Src substrate cortactin OS=Mus musculus GN=Cttn PE=1 SV=2	0.02625	0.73852
Q3UJB9	EDC4_MOUSE	Enhancer of mRNA-decapping protein 4 OS=Mus musculus GN=Edc4 PE=1 SV=2	0.02645	3.10651
Q9DC77	SMPX_MOUSE	Small muscular protein OS=Mus musculus GN=Smpx PE=1 SV=2	0.02798	0.347628
E9QA62	LMOD3_MOUSE	Leiomodin-3 OS=Mus musculus GN=Lmod3 PE=1 SV=1	0.02866	0.332877
P62852	RS25_MOUSE	40S ribosomal protein S25 OS=Mus musculus GN=Rps25 PE=1 SV=1	0.02993	1.39475
Q9CYR0	SSBP_MOUSE	Single-stranded DNA-binding protein, mitochondrial OS=Mus musculus GN=Ssbp1 PE=1 SV=1	0.03022	0.374451
Q8R0X7	SGPL1_MOUSE	Sphingosine-1-phosphate lyase 1 OS=Mus musculus GN=Sgpl1 PE=1 SV=1	0.03094	0.343166
Q9DC61	MPPA_MOUSE	Mitochondrial-processing peptidase subunit alpha OS=Mus musculus GN=Pmpca PE=1 SV=1	0.03304	1.60839
Q8BH04	PCKGM_MOUSE	Phosphoenolpyruvate carboxykinase [GTP], mitochondrial OS=Mus musculus GN=Pck2 PE=1 SV=1	0.03327	1.33033
Q8K4Z3	NNRE_MOUSE	NAD(P)H-hydrate epimerase OS=Mus musculus GN=Naxe PE=1 SV=1	0.0338	2.60958
Q8K4G5	ABLM1_MOUSE	Actin-binding LIM protein 1 OS=Mus musculus GN=Ablim1 PE=1 SV=1	0.03394	0.462781
P54726	RD23A_MOUSE	UV excision repair protein RAD23 homolog A OS=Mus musculus GN=Rad23a PE=1 SV=2	0.03401	1.50616
Q9DCS9	NDUBA_MOUSE	NADH dehydrogenase [ubiquinone] 1 beta subcomplex subunit 10 OS=Mus musculus GN=Ndufb10 PE=1 SV=3	0.03418	0.710999
Q91XV3	BASP1_MOUSE	Brain acid soluble protein 1 OS=Mus musculus GN=Basp1 PE=1 SV=3	0.03554	0.739812
O35737	HNRH1_MOUSE	Heterogeneous nuclear ribonucleoprotein H OS=Mus musculus GN=Hnrnph1 PE=1 SV=3	0.03593	1.4203
Q01730	RSU1_MOUSE	Ras suppressor protein 1 OS=Mus musculus GN=Rsu1 PE=1 SV=3	0.03701	1.51033
P58044	IDI1_MOUSE	Isopentenyl-diphosphate Delta-isomerase 1 OS=Mus musculus GN=Idi1 PE=1 SV=1	0.03711	1.31572
O70209	PDLI3_MOUSE	PDZ and LIM domain protein 3 OS=Mus musculus GN=Pdlim3 PE=1 SV=1	0.03724	0.768296
P62309	RUXG_MOUSE	Small nuclear ribonucleoprotein G OS=Mus musculus GN=Snrpg PE=1 SV=1	0.03746	0.666092
Q3THW5	H2AV_MOUSE	Histone H2A.V OS=Mus musculus GN=H2afv PE=1 SV=3	0.03748	1.60368
Q78XF5	OSTC_MOUSE	Oligosaccharyltransferase complex subunit OSTC OS=Mus musculus GN=Ostc PE=1 SV=1	0.03769	1.3398
P58771-2	TPM1_MOUSE	Isoform 2 of Tropomyosin alpha-1 chain OS=Mus musculus GN=Tpm1	0.03795	1.51842
Q8BKZ9	ODPX_MOUSE	Pyruvate dehydrogenase protein X component, mitochondrial OS=Mus musculus GN=Pdhx PE=1 SV=1	0.03815	0.464494
Q9EPC1	PARVA_MOUSE	Alpha-parvin OS=Mus musculus GN=Parva PE=1 SV=1	0.03862	0.05
Q9D379	HYEP_MOUSE	Epoxide hydrolase 1 OS=Mus musculus GN=Ephx1 PE=1 SV=2	0.03997	1.63687
P62315	SMD1_MOUSE	Small nuclear ribonucleoprotein Sm D1 OS=Mus musculus GN=Snrpd1 PE=1 SV=1	0.04034	1.58861
Q9ERG2	STRN3_MOUSE	Striatin-3 OS=Mus musculus GN=Strn3 PE=1 SV=1	0.04215	0.752376
Q9WUK2	IF4H_MOUSE	Eukaryotic translation initiation factor 4H OS=Mus musculus GN=Eif4h PE=1 SV=3	0.04219	1.35406
P19536	COX5B_MOUSE	Cytochrome c oxidase subunit 5B, mitochondrial OS=Mus musculus GN=Cox5b PE=1 SV=1	0.04271	0.54475
P32020	NLTP_MOUSE	Non-specific lipid-transfer protein OS=Mus musculus GN=Scp2 PE=1 SV=3	0.04483	0.696706
P17225	PTBP1_MOUSE	Polypyrimidine tract-binding protein 1 OS=Mus musculus GN=Ptbp1 PE=1 SV=2	0.04515	1.33925
Q8C1A5	THOP1_MOUSE	Thimet oligopeptidase OS=Mus musculus GN=Thop1 PE=1 SV=1	0.04757	0.758035
