# Supplementary material for: Vitamin D binding protein induces skeletal muscle atrophy and contributes to cancer-associated muscle wasting
Source: Research Square preprint supplement (doi:10.21203/rs.3.rs-4289125/v1), 2024-05-07
Supplement: Supplementary file 3 [file d2928acc1688bec656d238fa.xlsx]

## Sheet: Foglio1
Supplemental Table 3
DEGs in WT LLC vs WT SAL only				DEGs in VDBP KO LLC vs VDBP KO SAL only				Common DEGs
Gene	Log2FC	p value		Gene	Log2FC	p value		Gene	WT		VDBP KO
									Log2FC	p value	Log2FC	p value
Glul	1.80656	7.76506e-20		Osmr	1.559	2.9589e-10		S100a8	7.06186	1.24038e-73	6.47865	6.36653e-21
Loxl2	-1.58771	1.24535e-15		B3gnt3	1.66188	1.26293e-08		S100a9	6.49336	2.42937e-31	6.7171	4.48519e-50
Hmcn1	-1.59863	3.54721e-13		Lilr4b	1.88248	3.6794e-08		Gda	1.85752	1.98802e-30	1.90913	1.98234e-13
Cd53	1.87925	1.25405e-12		Gm24497	21.4486	2.59173e-07		Col1a1	-3.87712	4.53579e-24	-3.34047	2.14925e-05
Foxo6os	-2.84441	2.10273e-12		Cmah	1.79861	3.15895e-06		Slfn4	5.3875	3.11049e-19	5.19888	6.11309e-15
Ccl6	1.86218	4.79477e-12		Gm10132	-5.47964	0.000532808		Ssc5d	-3.11784	9.79583e-17	-2.56404	0.000141115
Galnt15	1.63655	5.06647e-12		Scd1	-1.64868	0.000555675		Acer2	3.1114	1.17796e-15	1.93232	0.0663334
Fndc1	-2.01106	9.23831e-12		Col11a2	-1.63792	0.00120967		Col3a1	-2.58019	1.24535e-15	-1.80395	0.0147942
Fbn1	-1.74052	1.62746e-11		5730419F03Rik	1.62668	0.0036293		Lcn2	4.15108	3.73564e-15	3.30479	2.85695e-06
Cebpb	1.61599	1.5245e-10		Col8a2	-1.66873	0.00471176		Col5a1	-1.88478	6.31811e-15	-1.58335	0.000411405
Gadd45a	1.58359	6.29922e-10		Plin1	-1.54295	0.00655146		Wfdc17	3.2094	1.53976e-14	2.76219	8.29406e-13
Il4ra	1.7108	1.22765e-09		Col5a3	-1.50602	0.00673826		Tmem252	3.38563	2.61771e-14	3.17948	4.07673e-07
Fkbp5	1.97952	3.62519e-09		Col16a1	-1.57882	0.0163637		Col1a2	-2.74877	3.94948e-14	-2.4939	1.39867e-08
Igsf10	-1.70347	4.41123e-09		Gsta3	-2.41764	0.0194844		Col12a1	-1.55634	4.88308e-14	-1.5539	0.00013602
Gm13490	-2.19208	7.97754e-09		Cyp2f2	-2.15563	0.0229285		Chil3	6.02468	2.71595e-13	4.48847	2.59173e-07
Atn1	-1.56082	2.9162e-08		Serpina1c	-9.5831	0.0316344		Ccr1	4.05949	2.19896e-12	2.22966	9.08665e-08
Ccl9	1.55731	5.53499e-08		Gm38254	1.94911	0.0328306		Tmem100	2.46308	1.35985e-11	1.65177	0.000685011
Fbxo32	1.87158	8.70366e-08		Gm15801	2.91715	0.0348587		Col6a2	-2.15984	1.62746e-11	-1.68873	0.00263204
Kdm6b	-1.5072	8.70366e-08		Serpina1d	-7.38213	0.0365215		Cxcr2	3.72946	3.80766e-11	5.70973	9.96538e-10
Trim63	2.02647	8.70366e-08		Arg1	-4.82173	0.0379825		Tnmd	-2.43266	5.07807e-11	-1.81951	0.00410505
Zfp362	-1.60674	1.51694e-07		Gm17218	-2.18112	0.0405667		Csf2rb	2.44812	6.3483e-11	2.32566	1.72817e-13
Cd248	-2.0147	1.70192e-07		Rgn	-6.90783	0.0484818		Csf3r	3.43296	9.21909e-11	2.67622	1.24129e-06
Ltbp4	-1.6151	3.33586e-07		4833403J16Rik	1.83442	0.061877		Cilp2	-2.50091	1.74086e-10	-2.54507	9.66396e-06
Rnu3a	19.9622	3.37299e-07		Rbp4	-1.85983	0.0639545		Mmp8	6.52622	1.75067e-10	5.95596	9.24006e-09
Sertad4	-1.70668	3.61981e-07		Gm42466	1.68521	0.065383		Col6a1	-1.73485	2.55377e-10	-1.58791	0.00158631
Socs3	1.80643	4.24444e-07		Orm1	-2.45061	0.0832304		Sell	3.00975	3.10974e-10	2.96976	5.62612e-09
Fibin	1.56856	9.93658e-07		Gm13378	2.96294	0.0850782		Col11a1	-2.03019	3.27193e-10	-1.91755	1.38184e-08
Mctp1	1.5692	1.07513e-06		Gm49369	3.51478	0.0903463		Ltf	8.92474	6.23812e-10	5.13001	6.04006e-10
Postn	-1.53986	1.10029e-06						Retnlg	8.60124	6.78563e-10	7.23724	3.6794e-08
F630028O10Rik	1.72895	1.25774e-06						Ifitm6	4.71489	4.30182e-09	2.53714	0.000483328
Arhgap26	1.87506	1.33375e-06						Ifitm1	3.07799	2.881e-08	2.80093	3.18774e-07
BC037032	-1.50385	1.43144e-06						Slc4a1	4.81124	6.44704e-08	4.07573	8.39278e-06
Eda2r	1.85042	1.43144e-06						Apol11b	4.06603	1.1894e-07	4.89194	5.31569e-06
Pde4a	-1.85568	1.81597e-06						Hbb-bt	3.12487	1.70192e-07	2.34736	0.00304207
Lgals3	1.64018	2.42989e-06						Il1b	4.83879	3.20336e-07	4.247	1.75942e-06
Fam171b	-1.6459	2.75435e-06						Csf2rb2	2.00569	4.05146e-07	2.08446	4.15462e-06
Actc1	-1.73259	3.34592e-06						Alas2	2.84701	5.98184e-07	2.92045	0.000685011
Mrtfa	-1.70794	3.68937e-06						Ngp	7.46214	6.94835e-07	7.97096	1.0025e-06
Grb14	-1.93737	4.01418e-06						Gypa	5.49298	7.08171e-07	5.34008	2.3427e-06
Sesn1	1.95851	4.01418e-06						Lilrb4a	1.74603	7.08171e-07	1.51547	0.00068077
Gm43921	-1.7135	5.67639e-06						Nepn	1.99249	8.02297e-07	2.6532	3.08807e-07
2410006H16Rik	2.45936	8.59544e-06						Hbb-bs	2.57609	1.37888e-06	1.92346	0.0120055
Kcng4	-1.70745	1.01411e-05						Clec4e	7.05282	2.4865e-06	5.98317	0.000450479
Ctxn3	1.69841	1.1087e-05						Trim10	7.0623	6.44207e-06	3.89201	0.00730365
Ptx4	-1.97117	1.18949e-05						Epb42	6.69034	1.02848e-05	3.72396	0.0188584
E330011O21Rik	-1.58815	1.69085e-05						Chil1	3.4931	1.53763e-05	1.6551	0.0663334
Adm	1.76179	1.76035e-05						Spta1	3.0247	1.71689e-05	3.26258	0.000173068
Map3k7cl	-1.83087	2.3e-05						Cxcl13	2.98652	1.92475e-05	2.64275	0.00843191
mt-Nd5	-1.59307	2.61311e-05						Mfap4	-2.2068	2.79823e-05	-2.11541	0.000114222
2310040G07Rik	-2.56151	2.89267e-05						Serpina3n	2.28181	2.88648e-05	1.74937	1.12995e-05
5430401H09Rik	-2.56683	3.33566e-05						1810073O08Rik	3.6244	3.14879e-05	2.65816	0.00190302
Retreg1	1.59496	3.35012e-05						Cstdc4	6.33801	3.51951e-05	4.22949	0.0145586
Cebpd	2.73291	3.51951e-05						Plac8	2.45189	4.6341e-05	2.29448	0.00109683
Wfdc21	4.56448	4.46332e-05						Tent5c	2.52946	4.83528e-05	2.51987	0.00192927
C4b	1.78677	4.57898e-05						Chad	-2.56114	5.05649e-05	-1.98899	0.00185156
Gm42970	-1.94639	4.64058e-05						Hdc	2.15952	5.58324e-05	1.56381	0.0148344
Il1r2	2.15626	6.00067e-05						Fpr2	5.79623	0.000141974	6.53145	0.000141115
Syn2	2.16659	6.27234e-05						Clec4d	3.26659	0.000180416	3.25846	0.00566804
Nrep	-2.17797	9.56532e-05						AI662270	2.17914	0.000191498	1.70158	0.0120055
Kcnn2	-1.80783	0.000115384						Fpr1	4.82256	0.000257329	5.00178	0.0109003
Cytip	1.77758	0.000151899						Gm32051	6.63186	0.000257337	5.88797	0.0222099
Thy1	-1.77671	0.000179231						Mcemp1	5.68138	0.000293556	4.20685	0.000945831
BB123696	2.84153	0.000191147						Kera	-2.7441	0.000307816	-2.10684	0.000271111
Irx3os	-2.27159	0.000211183						Wif1	-1.61693	0.000318785	-1.57431	0.0555477
Gm30794	-1.87169	0.000217559						Camp	5.65995	0.000359241	5.40076	0.00540405
Scgb3a1	5.6444	0.000288096						Ube2l6	1.54674	0.000413366	1.95293	0.000788903
Gm22614	-3.76197	0.000351712						Kcnf1	2.16619	0.000809383	1.74667	7.10209e-05
Gm43413	-1.8422	0.000356928						Stfa2l1	4.59525	0.00082715	4.38964	0.0184054
Hey1	1.74107	0.000367432						Hba-a1	1.9333	0.00132151	1.78204	0.000631403
Lrrc17	-1.54024	0.000407226						Hba-a2	2.17198	0.0014985	2.29109	0.00657846
Mmp9	1.92277	0.000410355						Sirpb1c	3.38868	0.00166774	3.1271	0.00955686
Myo1f	1.51262	0.000464488						Fcgr4	3.64462	0.00246685	3.50469	0.00977557
Klhl38	1.55651	0.000474059						AB124611	2.31567	0.00734596	1.94438	0.0136445
Il6ra	1.55062	0.000485523						Selp	1.582	0.00779987	2.11491	8.66833e-06
Col15a1	-1.56532	0.000545965						Gm45670	-2.31643	0.0110555	-1.74508	0.0111574
Gm10801	2.73472	0.000557463						Susd1	1.7372	0.0177262	1.85188	0.0588373
Acot1	2.48391	0.000559315						Ecrg4	-1.88653	0.0303222	-2.28146	0.0027033
Pdgfrl	-1.84714	0.000566733						Snca	2.82565	0.0393751	3.036	0.00410505
Glt8d2	-1.63371	0.000567608						Ccl8	2.59291	0.0396444	2.81886	8.39278e-06
H2bc18	-1.75598	0.000598236						Saa3	3.66056	0.0498129	4.37092	0.091395
Slc10a6	1.62826	0.000657364						Spon2	-1.621	0.0761363	-2.43731	0.0195385
Gm49339	4.12636	0.000676922
Alb	-3.68191	0.000786997
Mt2	1.76724	0.000820605
Srarp	5.82817	0.000825018
Arrdc3	1.93609	0.00129595
Hmga1b	-4.18081	0.00131779
Rac2	1.74626	0.00131779
Scn3b	1.57461	0.0016267
Gm9320	1.89612	0.0018718
Gm6055	2.43278	0.00234362
Cpxm1	-1.84554	0.00239115
Coro1a	1.63074	0.00282025
Mdga1	-1.66342	0.00285867
H3f3a-ps2	5.11257	0.00296922
Dusp2	2.50843	0.00319811
Gm50097	4.92447	0.00400501
Pik3r1	1.80938	0.00430603
Glipr1	2.94769	0.0044668
Gm10800	2.39014	0.00478213
Gm28439	-1.61823	0.0049087
Gm43797	2.68703	0.00510449
Grrp1	2.0196	0.00551137
Gm4724	-1.86383	0.00698476
Zfp993	2.4609	0.00699198
Tmem140	1.645	0.00719113
Slpi	2.79729	0.00782842
Gpr160	2.02929	0.00819138
Cacna2d4	-1.61183	0.00820036
Gm32391	-1.73298	0.00913555
Bcl3	2.84343	0.00922327
Gm15543	-1.59029	0.00946487
Gm23442	1.55207	0.00950593
Dnajc19-ps	-1.79318	0.0104364
Gm10638	1.65687	0.0106312
Gm29107	1.99795	0.0112365
Gm5420	-1.70914	0.0122364
Scarna3a	2.5764	0.0127477
Upp1	1.87646	0.0128198
2310001K20Rik	-1.83016	0.0131114
Bin2	2.21963	0.013634
Pglyrp1	3.81145	0.0140095
Depp1	3.26119	0.0142233
Rps13-ps1	2.11772	0.0149161
Gm30684	-2.56789	0.0161721
Gm2449	-3.00768	0.0162484
Lep	-2.26205	0.016437
Gm12514	3.59568	0.0180546
Itih4	3.51214	0.0221454
Stmn4	-1.98469	0.024931
Pilrb1	4.00298	0.0255786
Pthlh	-1.59855	0.027334
Gkn3	-1.88965	0.0282176
Snora44	2.00321	0.0283391
Gm12098	-1.88968	0.0286263
Gm17084	4.08744	0.0286342
Cdkn1a	1.66014	0.0292731
Gm49490	-2.7881	0.0292731
Cstdc5	4.40095	0.0293224
Mup22	2.81703	0.0294346
Kcp	-1.72676	0.0299832
Gm48048	4.77285	0.0304418
AA467197	2.7884	0.0305147
4430402I18Rik	1.85482	0.0317695
Gm49605	-2.39174	0.0328027
Cbs	3.28842	0.0333076
Arrdc2	1.6847	0.0344152
Cox7c-ps1	2.96669	0.0345465
Themis3	1.50942	0.0361577
Gm12435	-3.46073	0.0363478
Gm14539	2.35722	0.0376813
Gm12254	3.45595	0.0398911
B930036N10Rik	1.93121	0.0408351
4833419F23Rik	1.73161	0.0414269
Gm13803	3.24742	0.0422963
Crip3	-1.89218	0.0451746
Gm44243	1.6178	0.0465993
Gm5417	4.00879	0.049786
Ccl12	2.43276	0.0515901
Ms4a4c	1.83187	0.0537141
Amd-ps3	-1.64026	0.0541514
Ncf4	2.1835	0.0547934
Ntsr2	1.56165	0.0555946
Gm13198	-3.04484	0.0556453
Snora5c	2.72322	0.0556453
Hist1h4n	2.80864	0.0556953
Gm50433	1.73194	0.0559405
Atf3	1.77806	0.0606611
Gm7816	1.95794	0.0625301
Gm15756	-1.62876	0.0642188
Adnp	-1.64788	0.0657068
Gm5111	1.66239	0.0673567
Gm17538	-3.83185	0.0675395
Rps6-ps4	-1.72343	0.0683082
H3f3c	-1.61487	0.073232
Gm13123	4.1526	0.0828098
Gm10233	7.57651	0.0839476
Gm9392	-1.84917	0.0880783
Rab43	1.9107	0.0904518
Gm26316	-7.63915	0.0927048
Gm24830	-3.56764	0.0932088
Gm26232	-3.56764	0.0932088
Gm13502	1.64413	0.0932389
1810041H14Rik	1.57803	0.0941478
Gm10145	-2.60275	0.0944821
Dcdc2b	2.03325	0.0994751
